# Supplementary material for: Dynamics of an aqueous suspension of short hyaluronic acid chains near a DPPC bilayer
Source: Royal Society of Chemistry journal article supplement (doi:10.1039/d4cp01088d), 2024-01-01
Supplement: d4cp01088d1.pdf [file d4cp01088d1.pdf]

Supporting Information:  
Dynamics of aqueous suspension of short Hyaluronic acid chains  
near DPPC bilayer

Anirban Paul\*<sup>a</sup> and Jaydeb Chakrabarti\*<sup>b</sup>

<sup>a</sup>Department of Physics of Complex Systems, S.N. Bose National Centre for Basic Sciences,  
Block JD, Salt Lake, Kolkata-700098, India , email: anirbanpaulhdb@gmail.com,

<sup>b</sup>Department of Chemical and Biological Sciences and the Technical Research Centre, S. N.  
Bose National Centre for Basic Sciences, Block-JD, Sector-III, Salt Lake, Kolkata 700106,  
India , email: jaydeb@bose.res.in

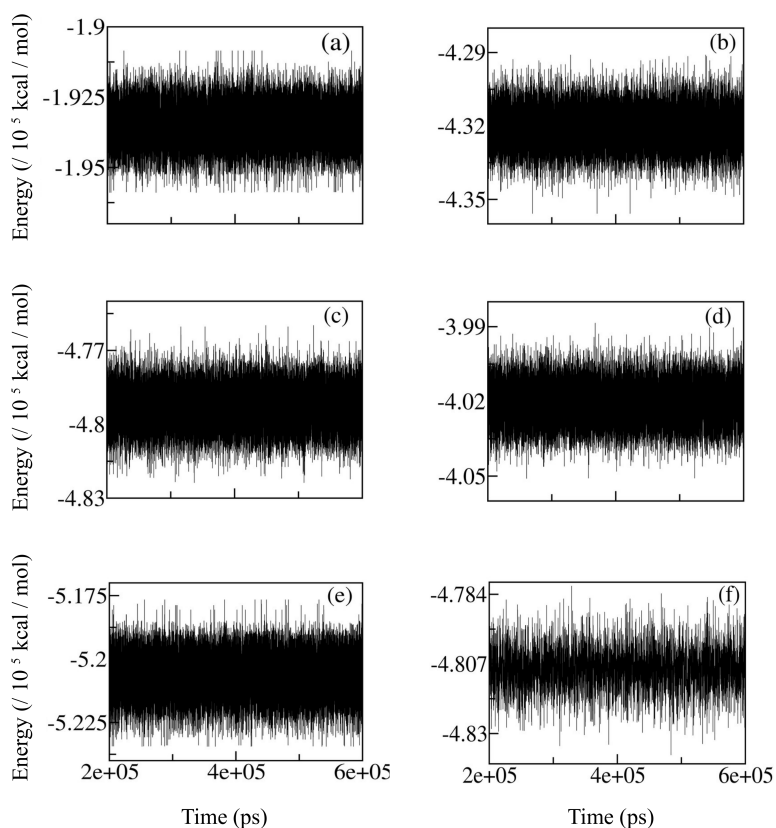

Figure S1: Total energy of the system at equilibrium for (a)  $n_{\text{HA}5}=0$ , (b)  $n_{\text{HA}5}=10$ , (c)  $n_{\text{HA}5}=30$ , (d)  $n_{\text{HA}5}=50$ , (e)  $N=1$  and (f)  $N=10$ .

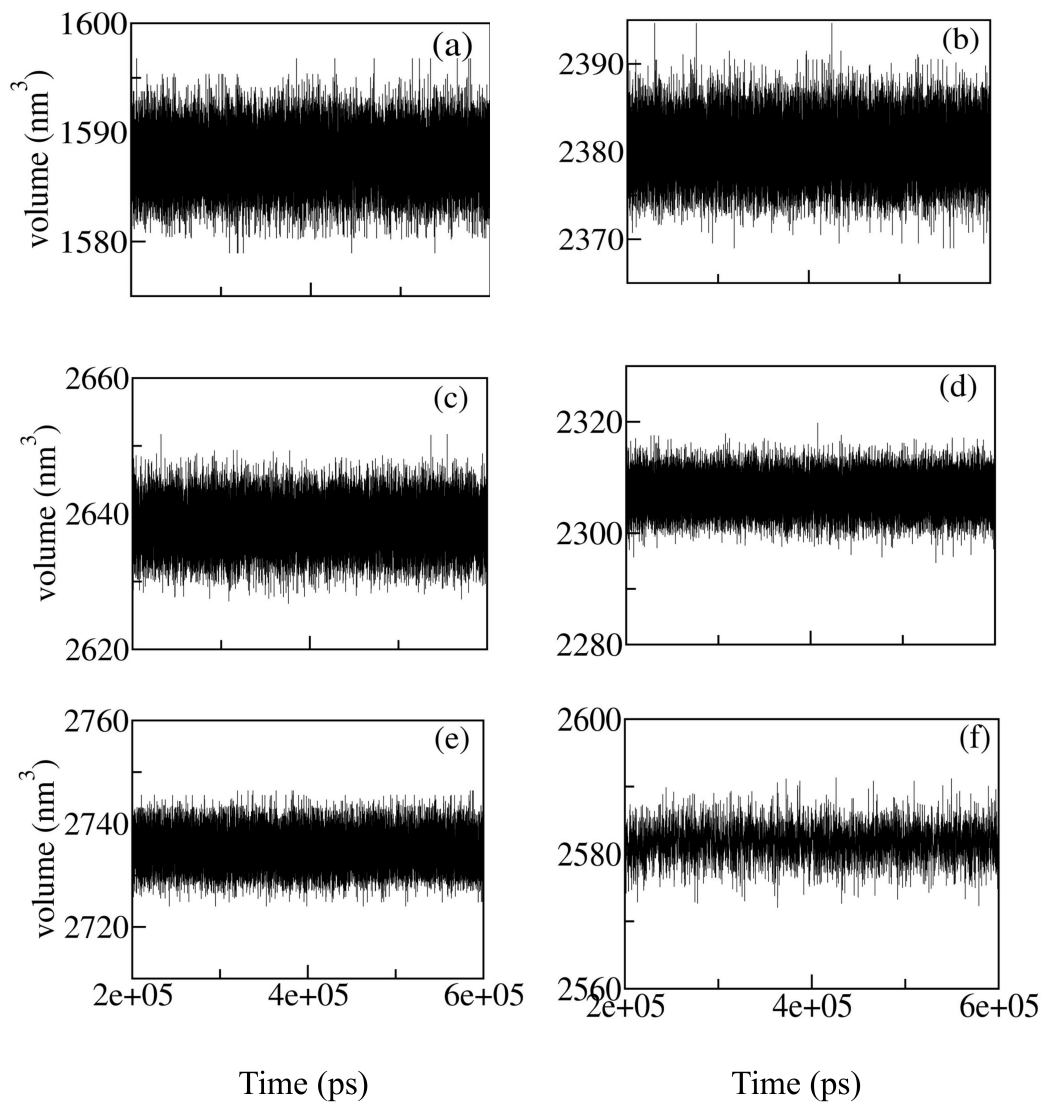

Figure S2: Volume of the simulation box at equilibrium for (a)  $n_{\text{HA5}}=0$ , (b)  $n_{\text{HA5}}=10$ , (c)  $n_{\text{HA5}}=30$ , (d)  $n_{\text{HA5}}=50$ , (e)  $N=1$  and (f)  $N=10$ .

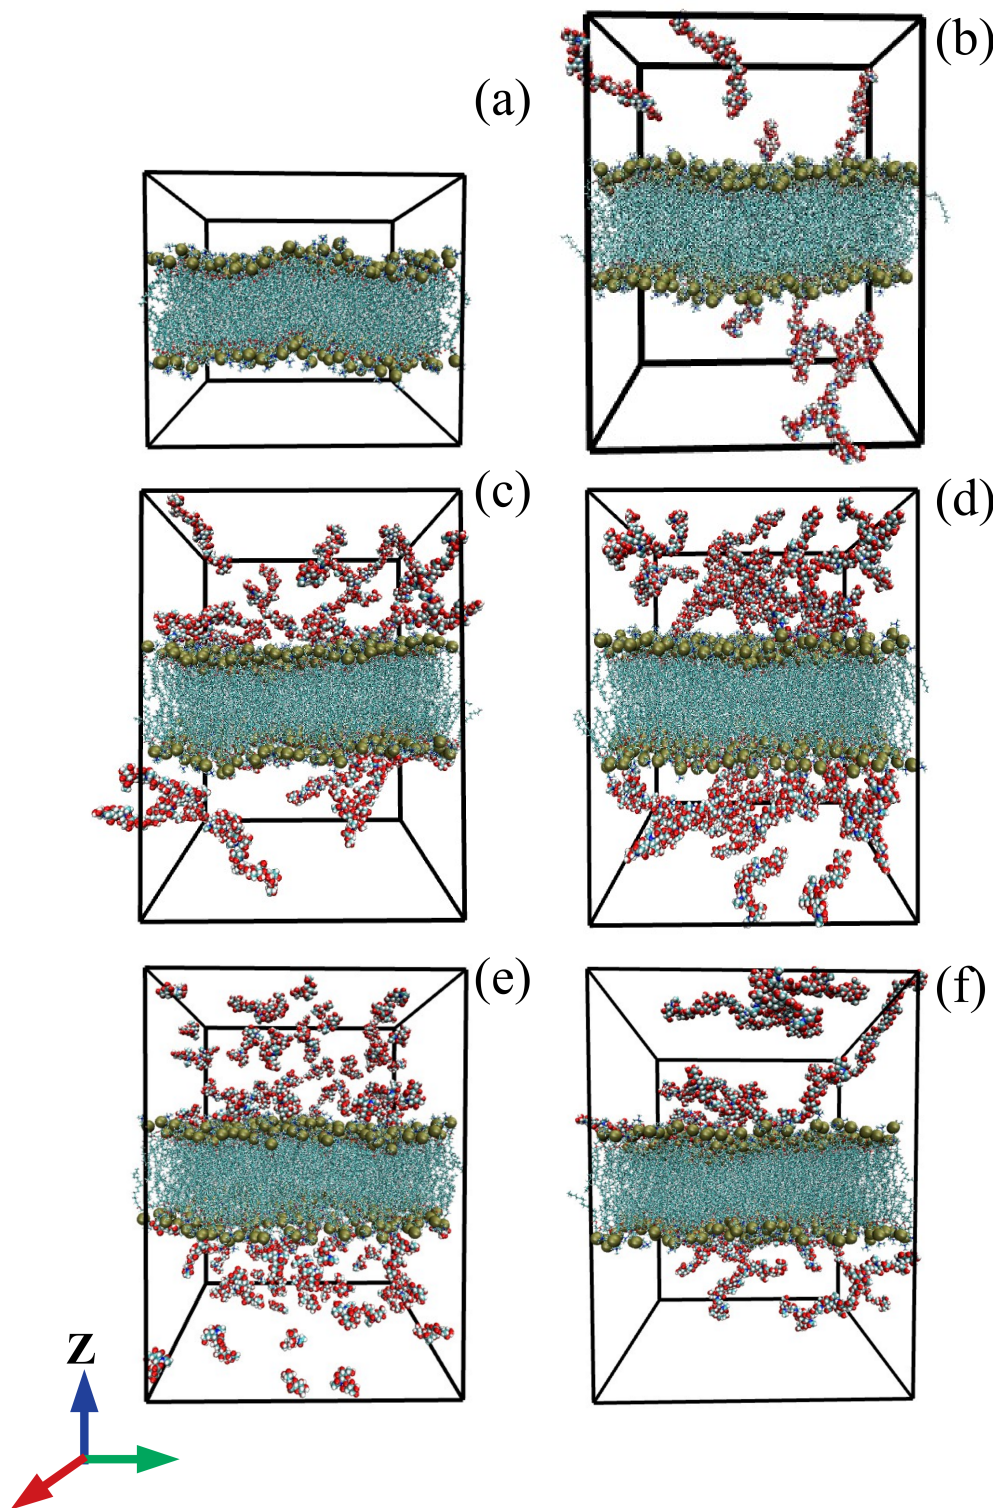

Figure S3: Typical equilibrium snapshot of (a)  $n_{HA5}=0$ , (b)  $n_{HA5}=10$ , (c)  $n_{HA5}=30$ , (d)  $n_{HA5}=50$ , (e)  $N=1$  and (f)  $N=10$ . Hyaluronic acids (HA) and lipid bilayer are shown in vdw and bonds representation respectively with the following color codes: *Cyan* for Carbons, *red* for Oxygens, and *blue* for Nitrogens. The normal of the lipid bilayer is along  $z$  axis. Water molecules are not shown.

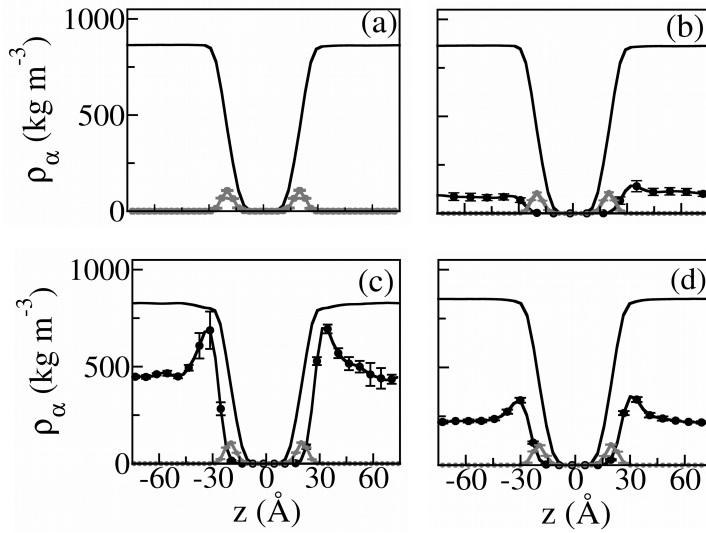

Figure S4: (a) Density profiles of Phosphorus atoms ( $\rho_P(z)$ , *grey solid line*), HA ( $\rho_H(z)$ , *dotted black line*), and water ( $\rho_W(z)$ , *solid black line*) along the bilayer normal for  $n_{HA5}=0$ , (b)  $n_{HA5}=10$ , (c)  $n_{HA5}=50$  and (d)  $N=1$ . Origin is set at the bilayer center.  $\rho_H(z)$  is amplified by a factor of 5.

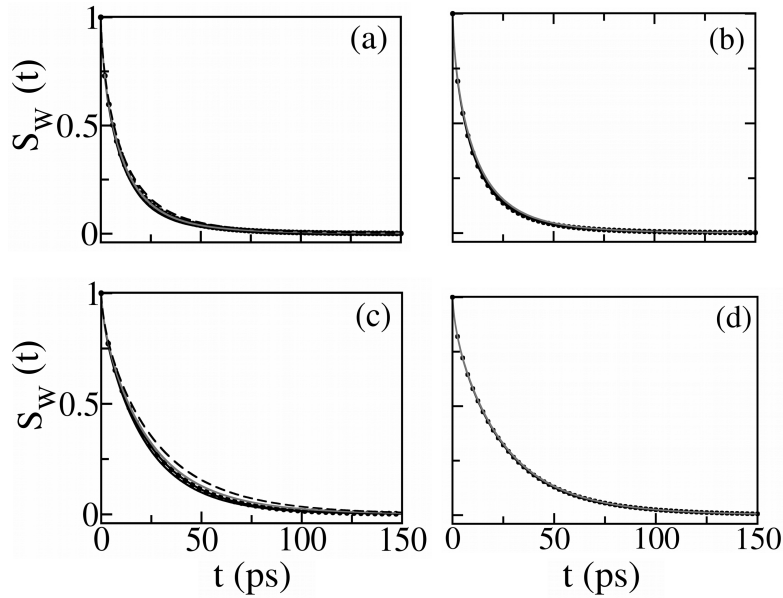

Figure S5: (a) Survival probability of water  $S_W(t)$  in region A for different HA concentrations:  $n_{HA5}=0$  (*solid black line*),  $n_{HA5}=10$  (*dotted black line*),  $n_{HA5}=30$  (*solid gray line*),  $n_{HA5}=50$  (*dashed black line*) and (b) for varying HA chain size:  $N=1$  (*solid black line*),  $N=1$  (*dotted black line*),  $N=10$  (*solid gray line*). (c)  $S_W(t)$  in region B for different  $n_{HA5}$  and (d) for different  $N$ . The same line type as (a)-(b) is used.

Table S1: Mean residence time of water in region A ( $\tau_W^A$ ) and in region B ( $\tau_W^B$ ), obtained from  $S_W(t)$  in respective regions (Figure S5).  $\tau_W^{A,0}$  and  $\tau_W^{B,0}$  are shown.

| system              | $\tau_W^A$ (ps)          | $\tau_W^B$ (ps)          |
|---------------------|--------------------------|--------------------------|
| $n_{\text{HA}5}=0$  | 10.86 ( $\tau_W^{A,0}$ ) | 20.07 ( $\tau_W^{B,0}$ ) |
| $n_{\text{HA}5}=10$ | 11.86                    | 21.24                    |
| $n_{\text{HA}5}=30$ | 11.83                    | 22.90                    |
| $n_{\text{HA}5}=50$ | 13.40                    | 25.27                    |
| N=1                 | 12.37                    | 22.32                    |
| N=5                 | 11.83                    | 22.90                    |
| N=10                | 12.79                    | 23.08                    |

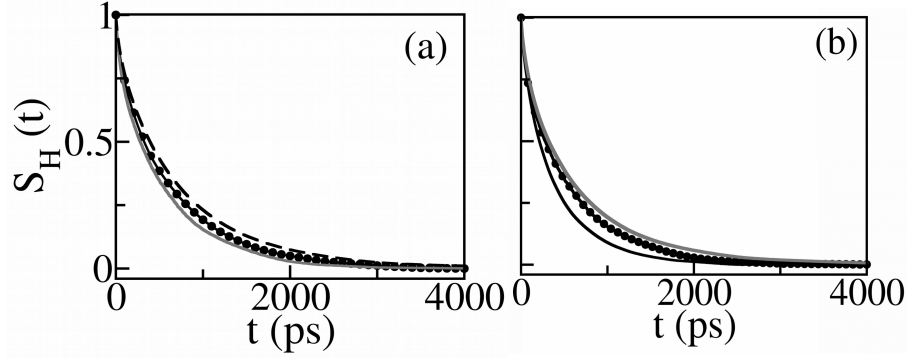

Figure S6: Survival probability of HA monomers  $S_H(t)$  in region B for (a)  $n_{\text{HA}5}=10$  (dotted black line),  $n_{\text{HA}5}=30$  (solid gray line),  $n_{\text{HA}5}=50$  (dashed black line), and (b) N=1 (solid black line), N=5 (dotted black line), N=10 (solid gray line).

Table S2: Mean residence time of HA monomers ( $\tau_H$ ) in region B, computed from  $S_H(t)$  (Figure S6).  $\tau_H^1$  is indicated.

| system              | $\tau_H$ (ps)         |
|---------------------|-----------------------|
| $n_{\text{HA}5}=0$  | -                     |
| $n_{\text{HA}5}=10$ | 568.84                |
| $n_{\text{HA}5}=30$ | 494.87                |
| $n_{\text{HA}5}=50$ | 677.04                |
| N=1                 | 372.48 ( $\tau_H^1$ ) |
| N=5                 | 494.87                |
| N=10                | 588.65                |

Table S3: Translational diffusion exponents ( $\beta_W$ ) of  $\langle r_W^2 \rangle$  in region A

| system              | $\beta_W$ |
|---------------------|-----------|
| $n_{\text{HA}5}=0$  | 0.75      |
| $n_{\text{HA}5}=10$ | 0.73      |
| $n_{\text{HA}5}=30$ | 0.73      |
| $n_{\text{HA}5}=50$ | 0.72      |
| N=1                 | 0.73      |
| N=5                 | 0.73      |
| N=10                | 0.73      |

Table S4: Rotational diffusion exponents ( $\gamma_W$ ) of  $\langle \phi_W^2 \rangle$  in region A

| system              | $\gamma_W$ |
|---------------------|------------|
| $n_{\text{HA5}}=0$  | 0.73       |
| $n_{\text{HA5}}=10$ | 0.72       |
| $n_{\text{HA5}}=30$ | 0.74       |
| $n_{\text{HA5}}=50$ | 0.72       |
| N=1                 | 0.73       |
| N=5                 | 0.73       |
| N=10                | 0.75       |

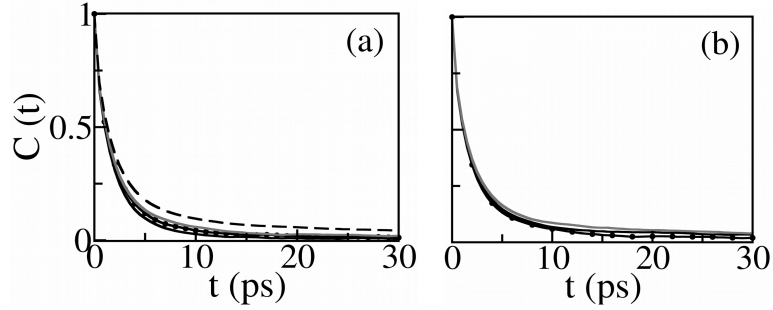

Figure S7: Rotational autocorrelation function of the water molecules ( $C(t)$ ) in region B for different HA concentrations:  $n_{\text{HA5}}=0$  (*solid black line*), 10 (*dotted black line*), 30 (*solid gray line*) and 50 (*dashed black line*) (b)  $\langle r_W^2 \rangle$  in region B for varying HA chain sizes: N=1 (*solid black line*), N=5 (*dotted black line*) and N=10 (*solid gray line*)

Table S5: First rank rotational autocorrelation time of water molecules,  $t_1^W$  in region B (computed from  $C(t)$  in SI Figure S7) and the product of  $t_1^W$  and rotational diffusion,  $D_R^W$

| system              | $t_1^W$ (ps) | $t_1^W \cdot D_R^W$ |
|---------------------|--------------|---------------------|
| $n_{\text{HA5}}=0$  | 1.84         | 0.51                |
| $n_{\text{HA5}}=10$ | 2.13         | 0.55                |
| $n_{\text{HA5}}=30$ | 2.21         | 0.56                |
| $n_{\text{HA5}}=50$ | 2.53         | 0.59                |
| N=1                 | 2.13         | 0.53                |
| N=5                 | 2.21         | 0.56                |
| N=10                | 2.53         | 0.60                |

Table S6: translational diffusion exponents ( $\beta_H$ ) of HA monomers in region B.

| system              | $\beta_H$ |
|---------------------|-----------|
| $n_{\text{HA5}}=0$  | -         |
| $n_{\text{HA5}}=10$ | 0.80      |
| $n_{\text{HA5}}=30$ | 0.80      |
| $n_{\text{HA5}}=50$ | 0.79      |
| N=1                 | 0.88      |
| N=5                 | 0.80      |
| N=10                | 0.79      |

Table S7: First rank rotational autocorrelation time  $t_1^H$  for interfacial HA monomers

| system              | $t_1^H$ (ns) |
|---------------------|--------------|
| $n_{\text{HA}5}=0$  | -            |
| $n_{\text{HA}5}=10$ | 6.1          |
| $n_{\text{HA}5}=30$ | 6.8          |
| $n_{\text{HA}5}=50$ | 7.7          |
| $N=1$               | 0.2          |
| $N=5$               | 6.8          |
| $N=10$              | 24.6         |

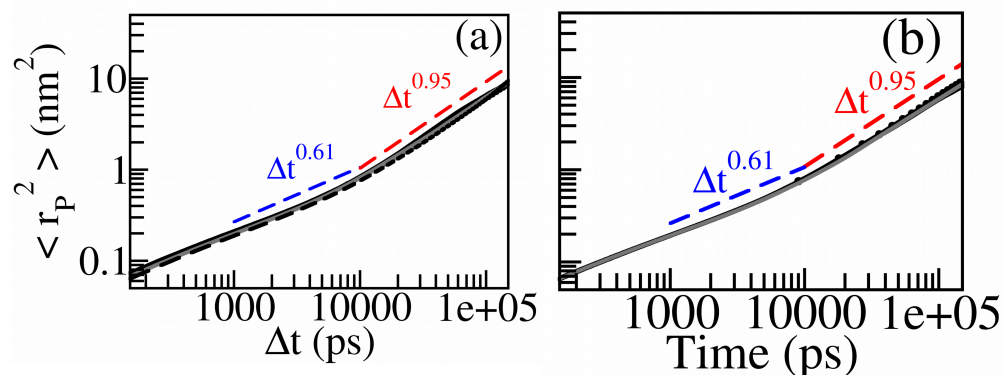

Figure S8: (a) Translational mean squared displacements of the Phosphorus atoms ( $\langle r_P^2 \rangle$ ) in the lateral plane of the bilayer for varying HA concentrations:  $n_{\text{HA}5} = 0$  (solid black line), 10 (dotted black line), 30 (gray solid line), 50 (dashed black line) and (b) for different HA chain sizes:  $N=1$  (solid black line),  $N=5$  (dotted black line) and  $N=10$  (solid gray line)

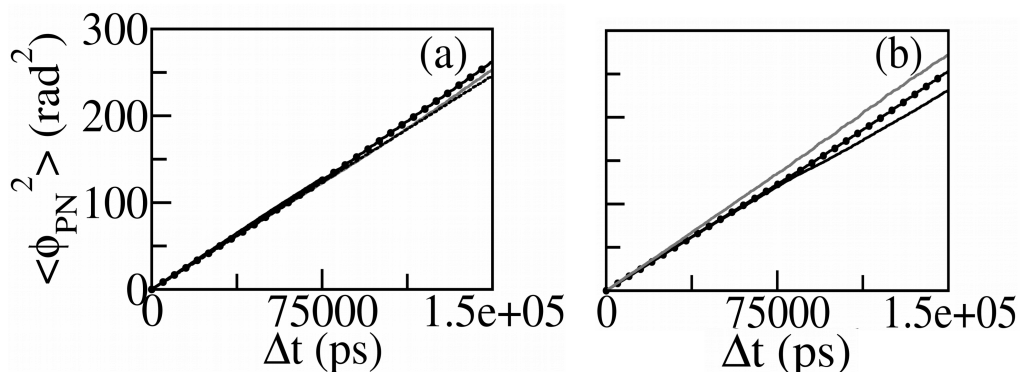

Figure S9: (a) Rotational mean squared displacements of the lipid PN vectors ( $\langle \phi_{PN}^2 \rangle$ ) for  $n_{\text{HA}5} = 0$  (solid black line), 10 (dotted black line), 30 (gray solid line), 50 (dashed black line) and (b) for  $N=1$  (solid black line),  $N=5$  (dotted black line) and  $N=10$  (solid gray line)
